# Supplementary material for: Hybrid nanoparticles with cell membrane and dexamethasone-conjugated polymer for gene delivery into the lungs as therapy for acute lung injury
Source: Royal Society of Chemistry journal article supplement (doi:10.1039/d2bm02109a), 2023-01-01
Supplement: d2bm02109a1.pdf [file d2bm02109a1.pdf]

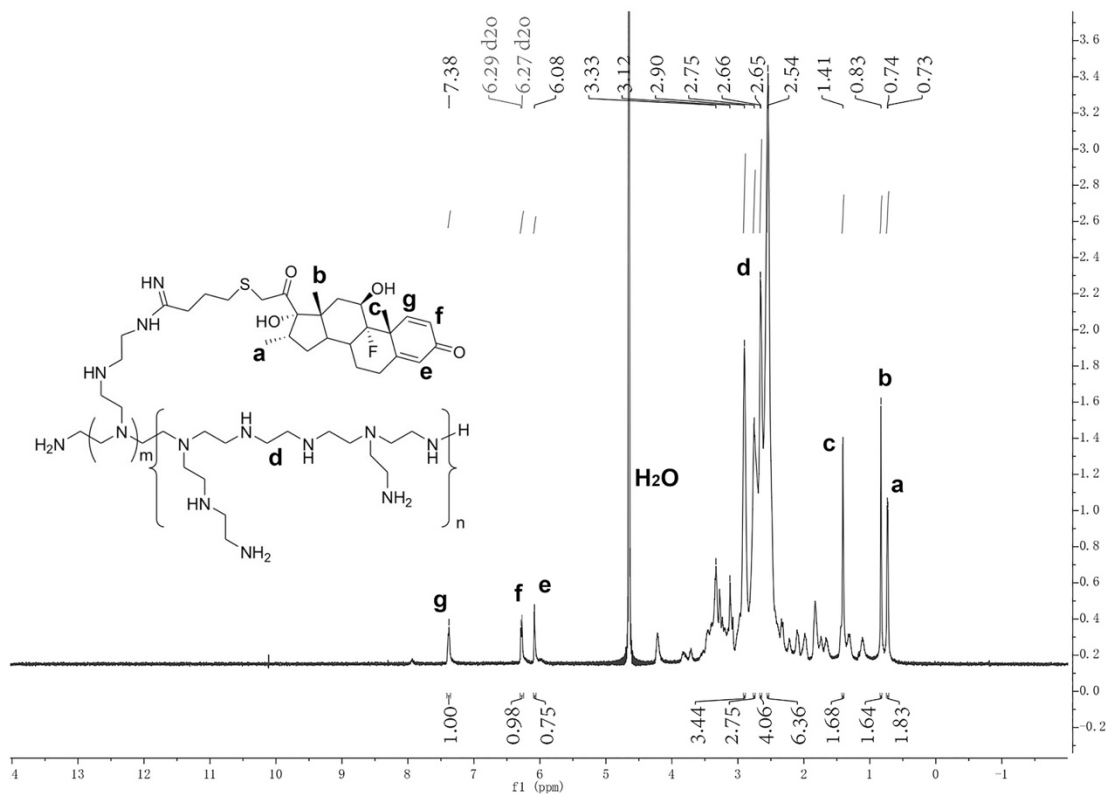

### Supplementary Figure 1. <sup>1</sup>H NMR of DP.

From the <sup>1</sup>H NMR calculations, it was observed that one mole of dexamethasone was conjugated per 1.3 mol of PEI.

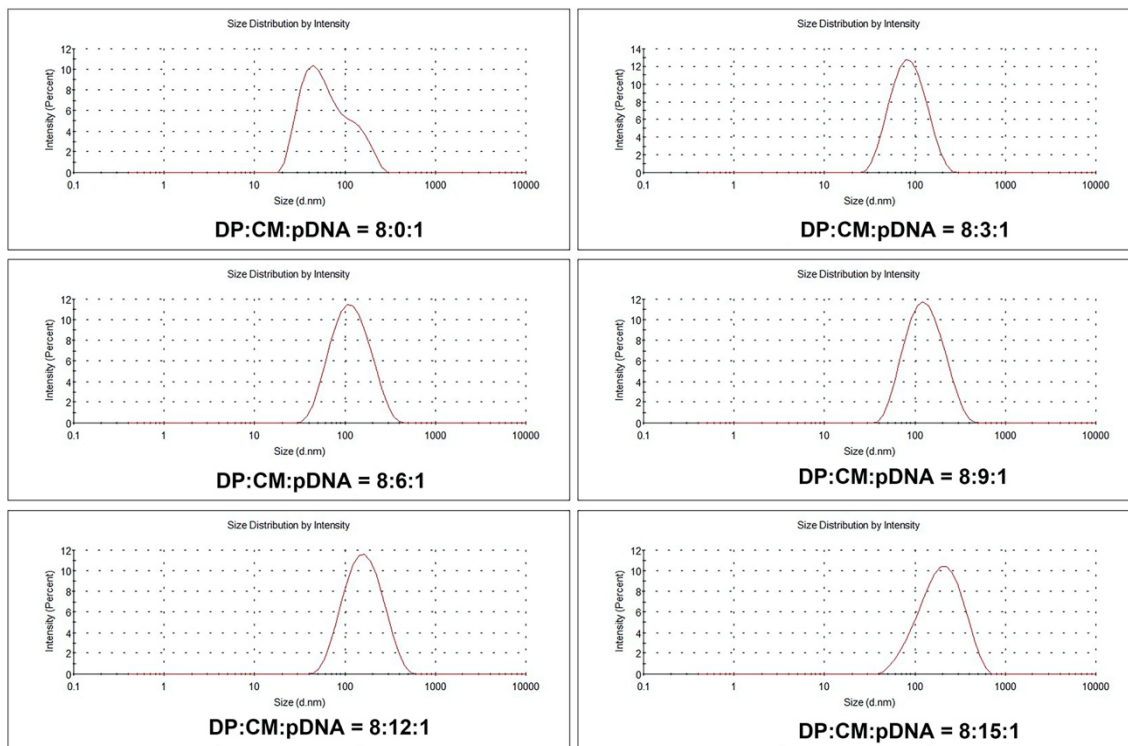

**Supplementary Figure 2. Size distribution of the DP/CM/pDNA nanoparticles.**

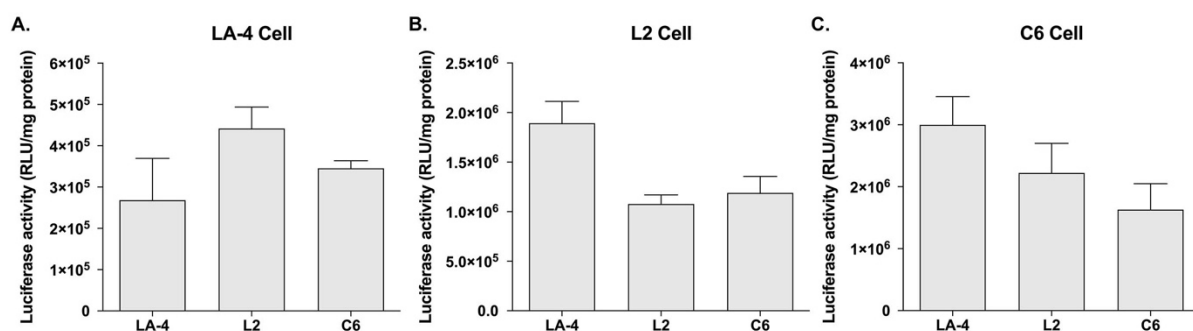

**Supplementary Figure 3. Transfection efficiencies of the DP/CM/pLuc nanoparticles into the various cells.** CMs were prepared from LA-4 mouse lung epithelial, L2 rat lung epithelial, and C6 rat glioblastoma cells. The DP/CM/pLuc nanoparticles were prepared with CM from LA-4, L2, and C6 cells. The nanoparticles were transfected into LA-4, L2, and C6 cells to verify homotypic targeting effects. The transfection efficiency was measured by luciferase assays. The results indicated that the transfection did not have cell-type specificity, suggesting that the DP/CM/pLuc nanoparticles did not have homotypic targeting effects. The data presented are the mean value  $\pm$  standard deviation of quadruplicate experiments.

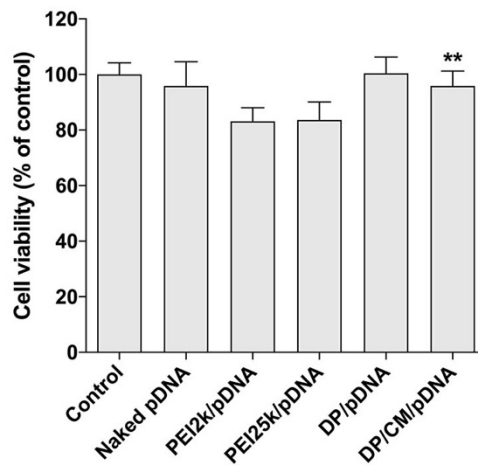

**Supplementary Figure 4. Cytotoxicity of the carrier/pDNA complexes.** PEI2k/pLuc, PEI25k/pLuc, DP/pLuc, and DP/CM/pLuc nanoparticles were prepared at their optimal ratios. The nanoparticles were transfected into LA-4 cells. After 24 h, the cytotoxicities of the nanoparticles were evaluated by MTT assays. The data presented are the mean value  $\pm$  standard deviation of quadruplicate experiments. \*\*P < 0.01 compared with PEI2k/pDNA and PEI25k/pDNA, but no statistical significance compared with control, naked pDNA, and DP/pDNA.
